# Supplementary material for: A Ferroptosis-Related Signature Robustly Predicts Clinical Outcomes and Associates With Immune Microenvironment for Thyroid Cancer
Source: Front Med (Lausanne). 2021 Apr 13;8:637743. doi: 10.3389/fmed.2021.637743 (PMC8076739; doi:10.3389/fmed.2021.637743)
Supplement: Supplementary Table 1 — A list of 60 ferroptosis-related genes. [file Table_1.XLSX]

## Sheet: Sheet1
ACSL4
AKR1C1
AKR1C2
AKR1C3
ALOX15
ALOX5
ALOX12
ATP5MC3
CARS1
CBS
CD44
CHAC1
CISD1
CS
DPP4
FANCD2
GCLC
GCLM
GLS2
GPX4
GSS
HMGCR
HSPB1
CRYAB
LPCAT3
MT1G
NCOA4
PTGS2
RPL8
SAT1
SLC7A11
FDFT1
TFRC
TP53
EMC2
AIFM2
PHKG2
HSBP1
ACO1
FTH1
STEAP3
NFS1
ACSL3
ACACA
PEBP1
ZEB1
SQLE
FADS2
NFE2L2
KEAP1
NQO1
NOX1
ABCC1
SLC1A5
GOT1
G6PD
PGD
IREB2
HMOX1
ACSF2
